# Supplementary material for: Efficient perovskite solar cells via surface passivation by a multifunctional small organic ionic compound
Source: Royal Society of Chemistry journal article supplement (doi:10.1039/d0ta02222e), 2020-01-01
Supplement: d0ta02222e1.pdf [file d0ta02222e1.pdf]

## Efficient Perovskite Solar Cells Via Surface Passivation by a Multifunctional Small Organic Ionic Compound

Xin Wu<sup>1#</sup>, Lu Zhang<sup>1#</sup>, Zhuo Xu<sup>1#</sup>, Selina Olthof<sup>3</sup>, Xiaodong Ren<sup>1\*</sup> Yucheng Liu<sup>1</sup>,  
Dong Yang<sup>4</sup>, Fei Gao<sup>1\*</sup> and Shengzhong (Frank) Liu<sup>1,2\*</sup>

<sup>1</sup>Key Laboratory of Applied Surface and Colloid Chemistry, Ministry of Education; Shaanxi Key Laboratory for Advanced Energy Devices; Shaanxi Engineering Lab for Advanced Energy Technology, School of Materials Science and Engineering, Shaanxi Normal University, Xi'an 710119, China

<sup>2</sup>Dalian National Laboratory for Clean Energy; iChEM, Dalian Institute of Chemical Physics, Chinese Academy of Sciences, Dalian 116023, Liaoning, China; University of the Chinese Academy of Sciences, Beijing 100039, China

<sup>3</sup>Department Chemie, Universität zu Köln Luxemburgerstr. 116, 50939, Köln

<sup>4</sup>Materials Science and Engineering, Pennsylvania State University, University Park, Pennsylvania 16802, United States

<sup>#</sup>These authors contributed equally to this work.

\*Corresponding authors: rxd0313@snnu.edu.cn; feigao@snnu.edu.cn;  
szliu@dicp.ac.cn

**Keywords:** perovskite solar cell, surface passivation, 1-Ethylpyridinium chloride, multifunctional, small organic ionic compound.

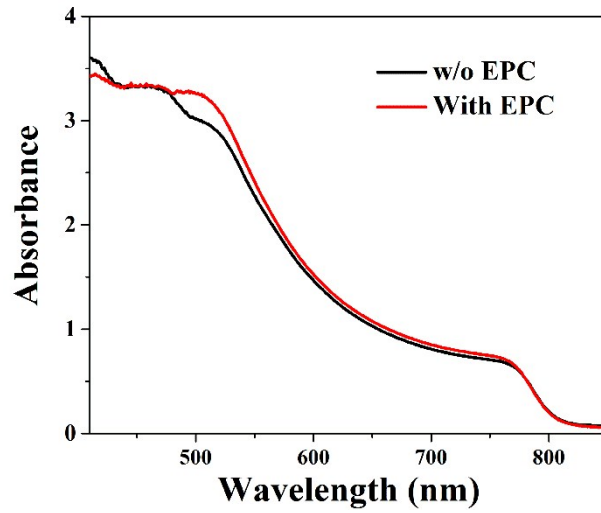

**Figure S1.** Absorption spectra of the perovskite film with and without EPC passivation.

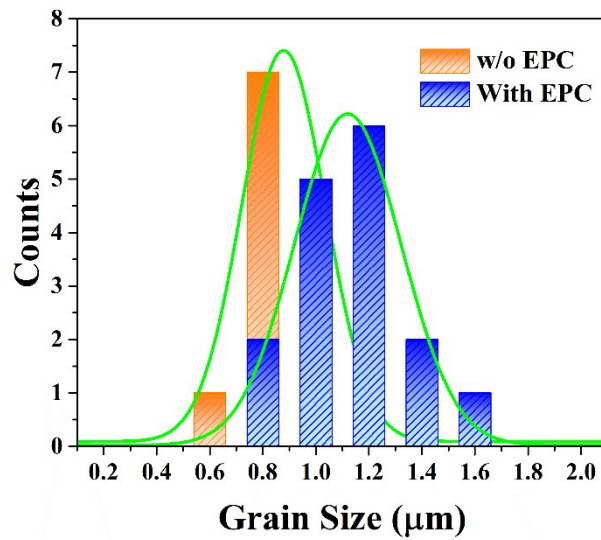

**Figure S2.** The grain size distribution of the perovskite thin films with and without EPC passivation.

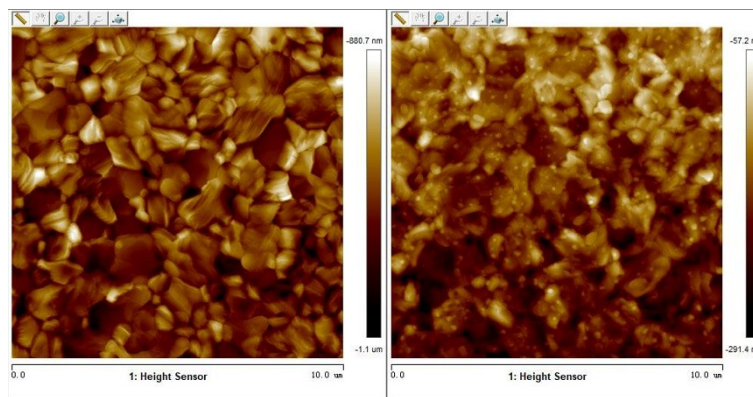

**Figure S3.** AFM topographical images of perovskite film without (a) and with (b) EPC passivation.

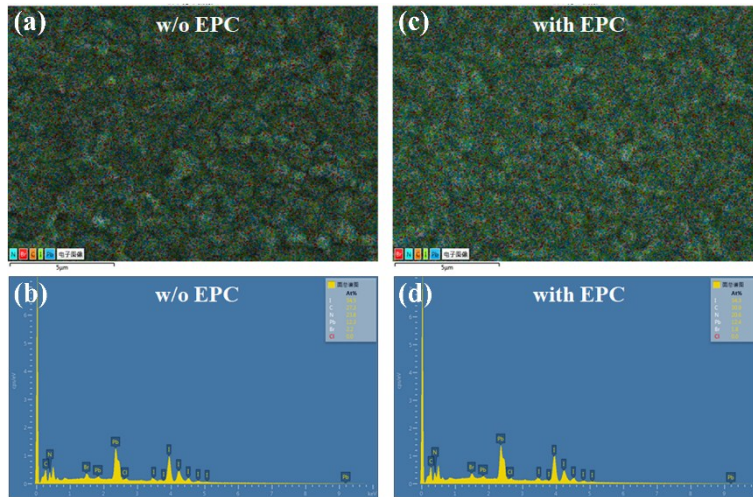

**Figure S4.** EDX mapping of I, C, N, Pb, and Br in perovskite film with and without EPC passivation.

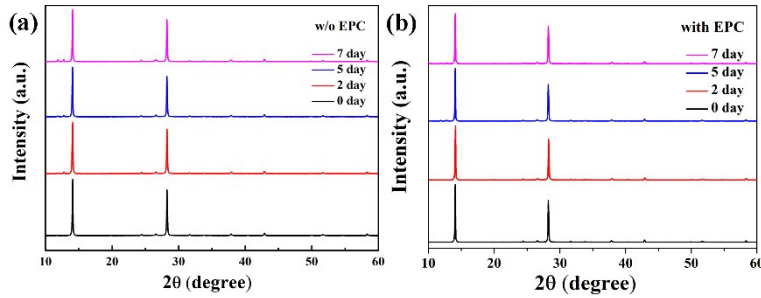

**Figure S5.** XRD pattern of the perovskite film without (a) and with (b) EPC passivation aging in ambient air condition (30~40 RH%).

**Table S1.** Fitting parameters of TRPL spectroscopy of the perovskite film without and with EPC passivation.

| Sample   | $\tau_{ave}$ (ns) | $\tau_1$ (ns) | $A_1$ (%) | $\tau_2$ (ns) | $A_2$ (%) |
|----------|-------------------|---------------|-----------|---------------|-----------|
| w/o EPC  | 126.9             | 31.46         | 9.06      | 129.21        | 90.94     |
| with EPC | 314.8             | 10.39         | 0.38      | 314.84        | 99.62     |

**Table S2.** Fitting parameters of TRPL spectroscopy of the perovskite/spiro-OMeTAD film without and with EPC passivation.

| Sample   | $\tau_{ave}$ (ns) | $\tau_1$ (ns) | $A_1$ (%) | $\tau_2$ (ns) | $A_2$ (%) |
|----------|-------------------|---------------|-----------|---------------|-----------|
| w/o EPC  | 58.08             | 3.73          | 12.61     | 58.58         | 87.39     |
| with EPC | 45.16             | 1.63          | 16.28     | 45.46         | 83.72     |

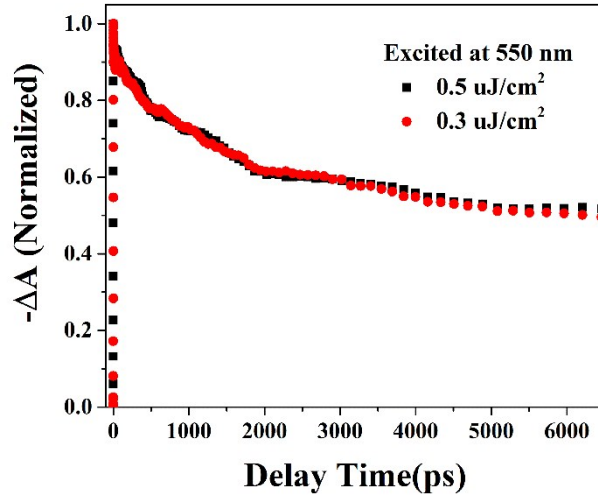

**Figure S6.** The relaxation dynamics as function of the pump fluence.

**Table S3.** Fitting parameters of TA spectroscopy of the perovskite/spiro-OMeTAD film without and with EPC passivation.

| Sample   | $\tau_1$ (ps) | $A_1$ (%) | $\tau_2$ (ns) | $A_2$ (%) |
|----------|---------------|-----------|---------------|-----------|
| w/o EPC  | 54.56         | 31.63     | 1.19          | 68.37     |
| with EPC | 54.39         | 32.52     | 1.20          | 67.48     |

**Table S4.** Photovoltaic parameters in forward and reverse scans of the champion PSCs with and without EPC concentration.

|          |         | $J_{sc}$<br>(mA cm <sup>-2</sup> ) | $V_{oc}$<br>(V) | PCE<br>(%) | FF    | $R_s$<br>( $\Omega$ ) | $R_{sh}$<br>(k $\Omega$ ) | HI    |
|----------|---------|------------------------------------|-----------------|------------|-------|-----------------------|---------------------------|-------|
| w/o EPC  | Reverse | 24.28                              | 1.044           | 19.52      | 0.769 | 46.3                  | 31.84                     | 0.079 |
|          | Forward | 24.06                              | 1.035           | 17.26      | 0.693 | 75.94                 | 19.17                     |       |
| with EPC | Reverse | 25.02                              | 1.053           | 21.19      | 0.805 | 47.71                 | 75.76                     | 0.023 |
|          | Forward | 24.87                              | 1.049           | 20.28      | 0.777 | 51.29                 | 46.31                     |       |

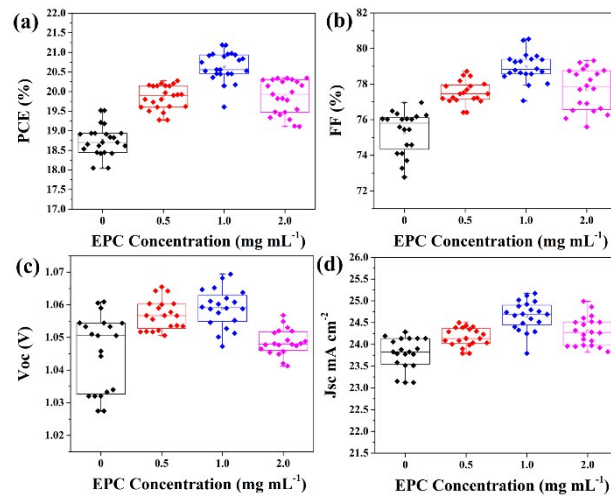

**Figure S7.** EPC concentration dependence of photovoltaic parameters: (a) open-circuit

voltage ( $V_{OC}$ ); (b) short-circuit current density ( $J_{SC}$ ); (c) PCE; (d) fill factor (FF). Results are shown with statistical distributions based on observations from 15 cells for each group.

**Table S5.** Photovoltaic parameters of the PSCs fabricated with different EPC concentration.

| EPC concentration<br>(mg mL <sup>-1</sup> ) |             | $J_{sc}$<br>(mA cm <sup>-2</sup> ) | $V_{oc}$<br>(V) | PCE<br>(%)   | FF            |
|---------------------------------------------|-------------|------------------------------------|-----------------|--------------|---------------|
| 0                                           | Max         | 24.28                              | 1.044           | 19.52        | 0.753         |
|                                             | Averag<br>e | 23.79 ± 0.35                       | 1.045 ± 0.01    | 18.75 ± 0.37 | 0.769 ± 0.012 |
| 0.5                                         | Max         | 24.40                              | 1.059           | 20.27        | 0.785         |
|                                             | Averag<br>e | 24.16 ± 0.21                       | 1.057 ± 0.004   | 19.80 ± 0.30 | 0.775 ± 0.006 |
| 1.0                                         | Max         | 25.02                              | 1.053           | 21.19        | 0.805         |
|                                             | Averag<br>e | 24.65 ± 0.33                       | 1.059 ± 0.005   | 20.64 ± 0.36 | 0.789 ± 0.008 |
| 2.0                                         | Max         | 24.86                              | 1.046           | 20.34        | 0.782         |
|                                             | Averag<br>e | 24.30 ± 0.32                       | 1.048 ± 0.004   | 19.86 ± 0.42 | 0.777 ± 0.010 |

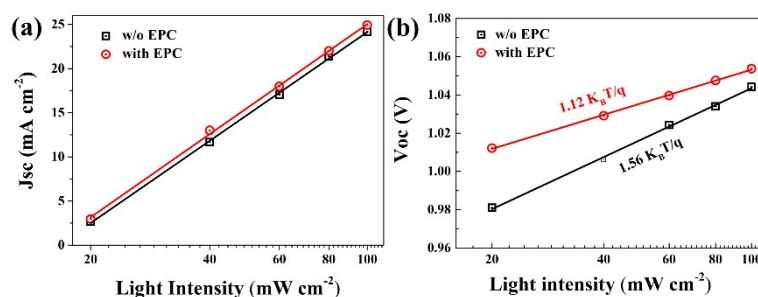

**Figure S8** (a)  $J_{SC}$  vs. light intensity and (b)  $V_{OC}$  vs. light intensity with and without EPC passivation.
